# Supplementary material for: Glucocorticoid Receptor β Overexpression Has Agonist-Independent Insulin-Mimetic Effects on HepG2 Glucose Metabolism
Source: MDPI journal article supplement (doi:10.3390/ijms23105582), 2022-05-17
Supplement: s1 [file s1]

**Supplementary Table S1. List of Primers**

| Gene           | Forward primer                   | Reverse Primer                 |
|----------------|----------------------------------|--------------------------------|
| GR $\beta$     | 5' ACTCTTGGATTCTATGCATGAAAATG 3' | 5' TGTGTGAGATGTGCTTTCTGGTTT 3' |
| PTEN           | 5' GGCTAAGTGAAGATGACAATC 3'      | 5' A GTTACTCCCTTTTTGTCTCTG 3'  |
| G6P            | 5' CCGAGCTTSCTSCACTTTTC C 3'     | 5' GGTGATGACCAAATAATATCC 3'    |
| PEPCK          | 5' ATTCTGGGTATAACCAACCC 3'       | 5' GTTGATGGCCCTTAAATGAC 3'     |
| SLC2A1         | 5' ACCTCAAATTTTCATTGTGGG 3'      | 5' GAAGATGAAGAACAGAACCAG 3'    |
| SLC2A2         | AGAAGATTAGACTTGGACTCTC           | 5' GTGACCTTATCTTCTGTCATTG 3'   |
| SLC2A4         | 5' CCATTGTTATCGGCATTCTG 3'       | 5' ATTCTGGATGATGTAGAGGTAG 3'   |
| Hexokinase II  | 5' GAAAGCAACTGTTTGAGAAG 3'       | 5' CAATGTCTGAGATGTCTTTGG 3'    |
| GBE            | 5' ATTGTGCTAGATTCAGATGC 3'       | 5' CACCAAAAGAGAATAGGGAC 3'     |
| GAPDH          | 5' CTGCCCCCTCTGCTGATG 3'         | 5' TCCACGATACCAAAGTTGTCATG 3'  |
| $\beta$ -Actin | 5' GGACTTCGAGCAAGAGATGG 3'       | 5' AGCACTGTGTTGGCGTACAG 3'     |
| YWHAZ          | 5' TGCTTCACAAGCAGAGCA 3'         | 5' GTTAAGGGCCAGACCCAGTC 3'     |
| PDK4           | 5' CTTGGGAAAAGAAGACCTTAC 3'      | 5' GTGCAGTGGAGTATGTATAAC 3'    |
